# Supplementary material for: Bevacizumab significantly increases the risks of hypertension and proteinuria in cancer patients: A systematic review and comprehensive meta-analysis
Source: PubMed Central journal article supplement (PMC5584263; doi:10.18632/oncotarget.18190), 2017-05-23
Supplement: oncotarget-08-51492-s001.pdf [file oncotarget-08-51492-s001.pdf]

## **Bevacizumab significantly increases the risks of hypertension and proteinuria in cancer patients: A systematic review and comprehensive meta-analysis**

### **Supplementary Materials**

**Supplementary Table 1: Baseline characteristics of randomized–controlled trials (RCTs) included in the meta-analysis ( $n = 42510$ ). See [Supplementary\\_Table\\_1](#)**

**Supplementary Table 2: Stratified analysis of incidence and RRs of high-grade hypertension and proteinuria for cancer patients treated with bevacizumab. See [Supplementary\\_Table\\_2](#)**

**Supplementary Table 3: Stratified analysis of incidence and RRs of all-grade hypertension and proteinuria for cancer patients treated with bevacizumab. See [Supplementary\\_Table\\_3](#)**
